# Supplementary material for: Crystallographic analyses illustrate significant plasticity and efficient recoding of meganuclease target specificity
Source: PubMed Central journal article supplement — Nucleic Acids Res. 2017 Jun 20;45(14):8621–34. doi: 10.1093/nar/gkx544 (PMC5737575; doi:10.1093/nar/gkx544), 2017-06-20
Supplement: gkx544_supp.pdf [file gkx544_supp.pdf]

## SUPPLEMENTARY DATA

**Supplementary Figure S1. Method of yeast surface display and flow cytometry to measure enzyme specificity.** The enzyme being assayed is displayed on the surface of yeast, and its ability to cleave each substrate (both the unmodified, intended target, and a panel of 66 separate DNA targets that each differ from the intended target by a single base pair substitution as one position) is measured by cell staining and flow cytometric analyses. In each separate cleavage measurement, a fluorescently labeled DNA substrate is provided in the presence of  $\text{Ca}^{2+}$  (which allows binding but fully inhibits cleavage) versus  $\text{Mg}^{2+}$  (which allows cleavage, and results in a reduction in staining fluorescence intensity). See *Methods* and references (31,33) for further experimental details.

### Yeast surface display

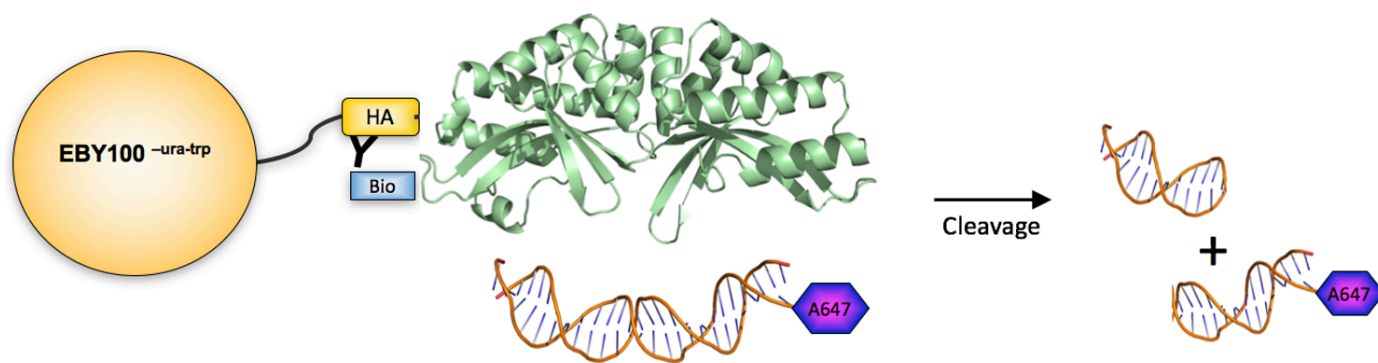

### Flow cytometric selections

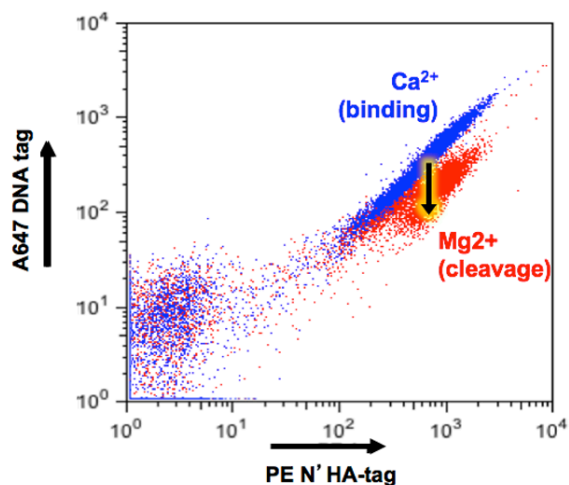

**Supplementary Figure S2. Generation of transgenic mosquitos harboring and expressing eOnu7280.**  
**Panel a:** Schematic diagram of the transformation vector used to generate the I1-H7280A1 transgenic mosquito strain. Contains PiggyBac inverted repeats (pBac), a Pax promoter (3xP3), a marker gene (DsRed), the mail spermatogenesis specific b2 tubulin promoter (b2), the eOnu7280 endonuclease reading frame (eOnu7280) self-cleaving peptide signals (T2A) and a SV40 nuclear localization signal (NLS). **Panel b:** Overlays of transmission (tm) and fluorescent images of the larval head and dissected adult testes of male mosquitos. **Panel c:** Native target site in the AGAP007280 gene and representative disruptions identified in F1 progeny of transgenic I1-H7280A1 male mosquitos.

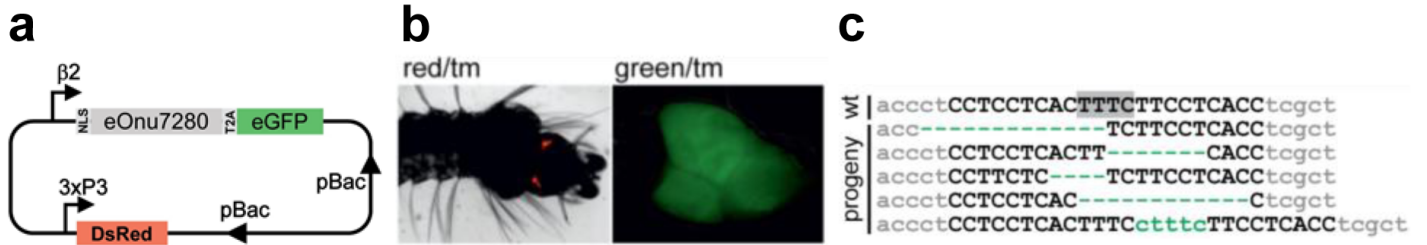

**Supplementary Figure S3. Sequence alignment of eOnu constructs. Related to Figure 1.**

Secondary structural elements, and the linker that connects the N- and C-terminal protein domains, are indicated above the sequence alignments. Positions that have been mutated on the protein surface and inter-domain linker to improve protein solubility, and that are present in all 5 engineered constructs are indicated with bold font and underlying black asterisks. Positions in the DNA-binding surface that were subjected to randomization and selection, and that are altered relative to the same position in the wild-type enzyme, are indicated with bold green (N-terminal domain) or bold blue (C-terminal domain) fonts and similarly colored underlying asterisks. Positions that were found to be mutated at other scaffold positions in individual engineered constructs (due to random PCR-induced mutations) are indicated with bold font and vertical lines. The sequence of the first two N-terminal residues differ depending on whether the construct was being studied with activity assays using yeast surface display or being used for crystallization experiments, and the positions are therefore indicated with dashes.

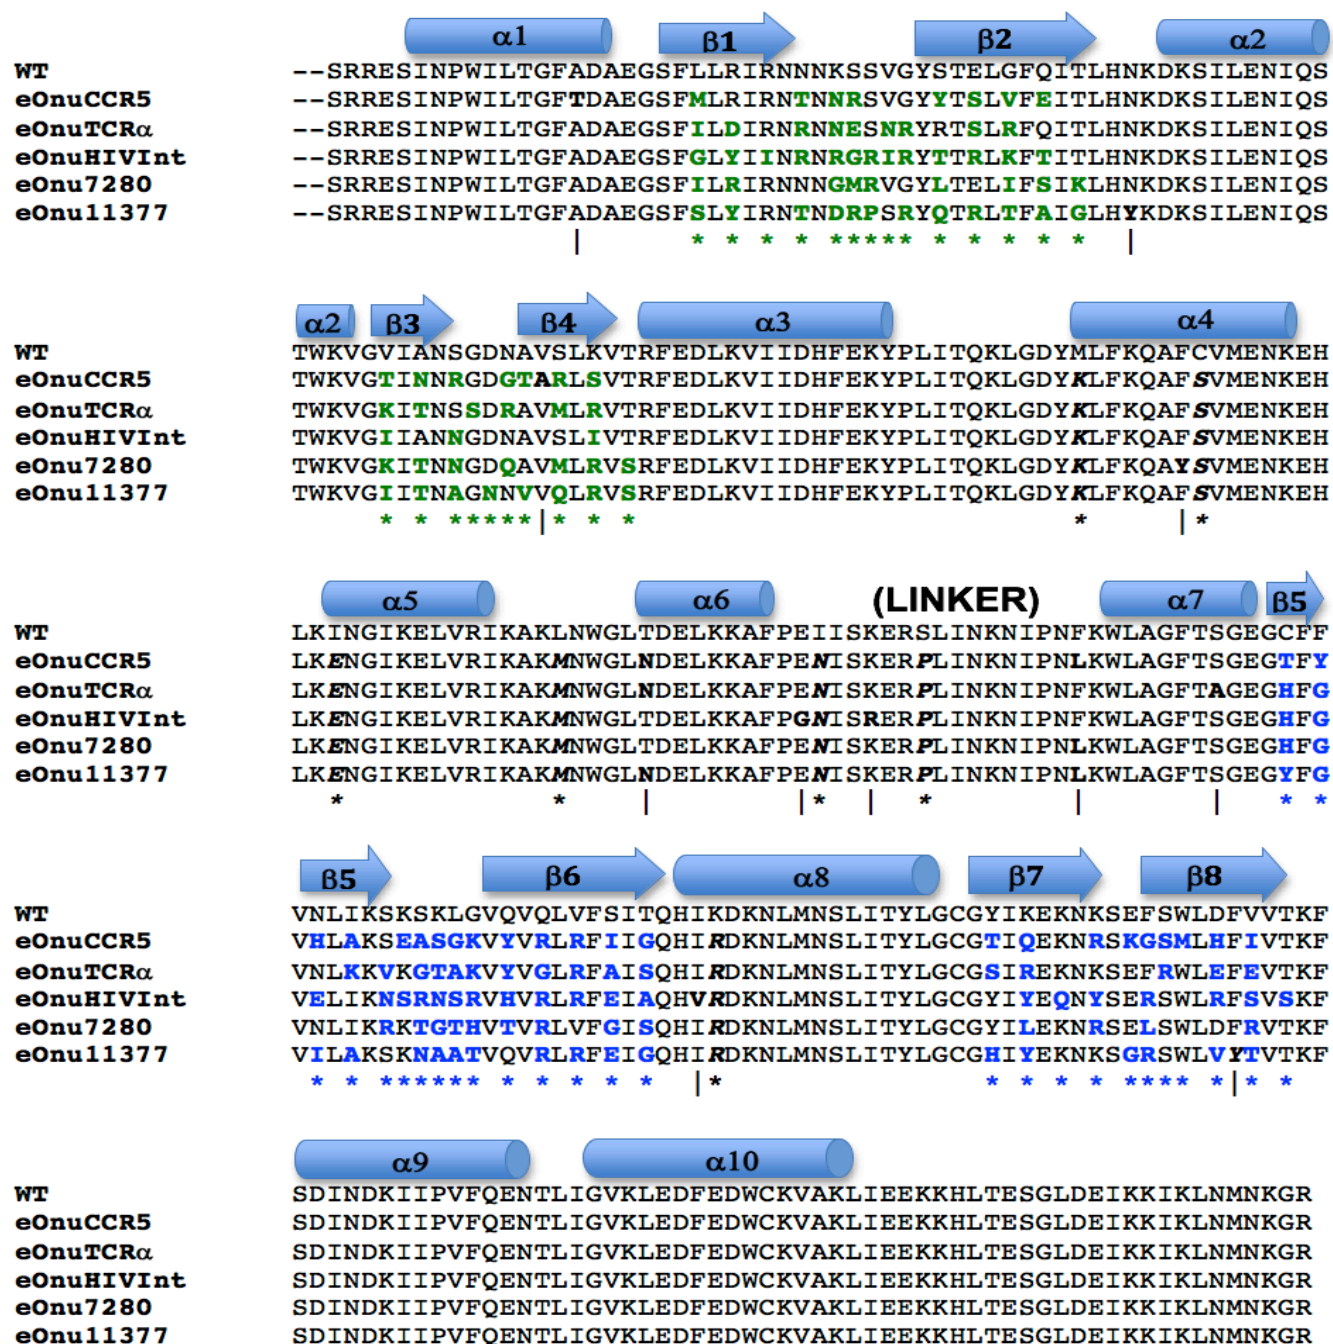

**Supplementary Figure S4. 'One-off' cleavage specificity analyses of eOnuTCR $\alpha$  and eOnu7280. Related to Supplementary Figure S1 and Figure 5. *Panel a*: Cleavage data for eOnuTCR $\alpha$  (presented in tabulated form in Figure 5) for a panel of substrates that each differ from the enzyme's intended target by a single basepair substitution at one position. *Panel b*: Similar cleavage data for eOnu7280 (also presented in tabulated form in Figure 5).**

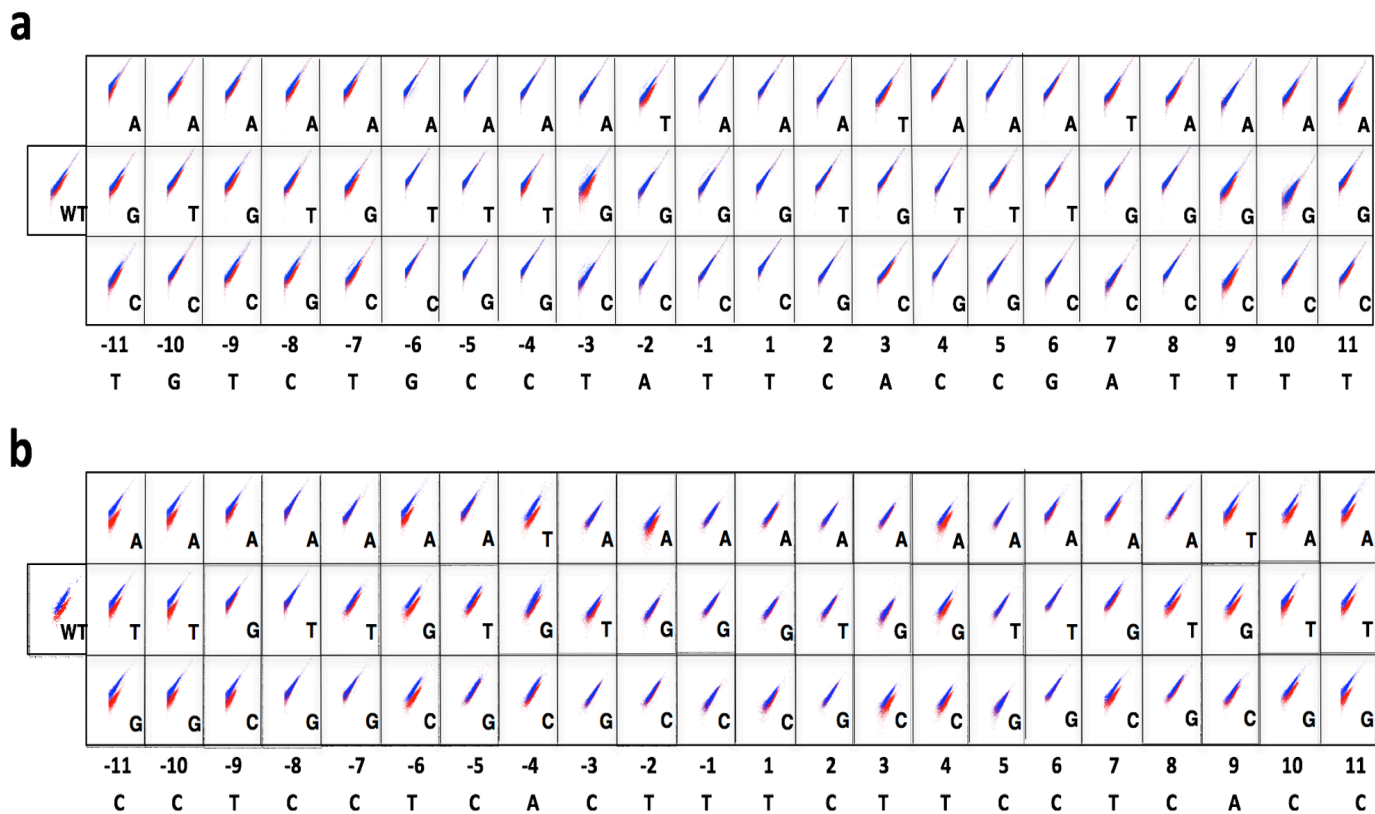

**Supplementary Figure S5. Evidence for waters mediating direct contacts between DNA and protein in low resolution structures.** eOnuCCR5 (slate blue; a and b) and eOnu11377 (cyan; c through h) have waters modeled and refined at positions in the protein-DNA interface that appear to participate in target recognition. Unbiased simulated annealing omit maps were generated with Phenix for all waters in the eOnuCCR5 and eOnu11377 structures. The waters mediating direct contacts between the DNA and protein are shown in their DNA/protein context with 2Fo-Fc density maps (dark blue) contoured at a sigma cut-off 1.0, and Fo-Fc difference maps (green) contoured at a sigma cut-off 3.0. Green density, indicating the presence of a 3s peak in the S.A. omit Fo-Fc difference map, is visible for each water except in panel h, where the sidechain of R199 moved into the place of the water; at that position the 2Fo-Fc density (dark blue) around the water is presented. The remaining waters in the two structures were modeled according to the same criteria, and are not located in the protein-DNA interface.

## CCR5

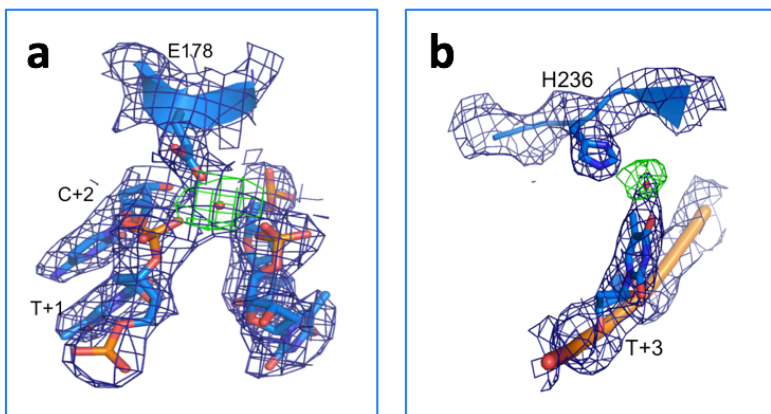

## 11377

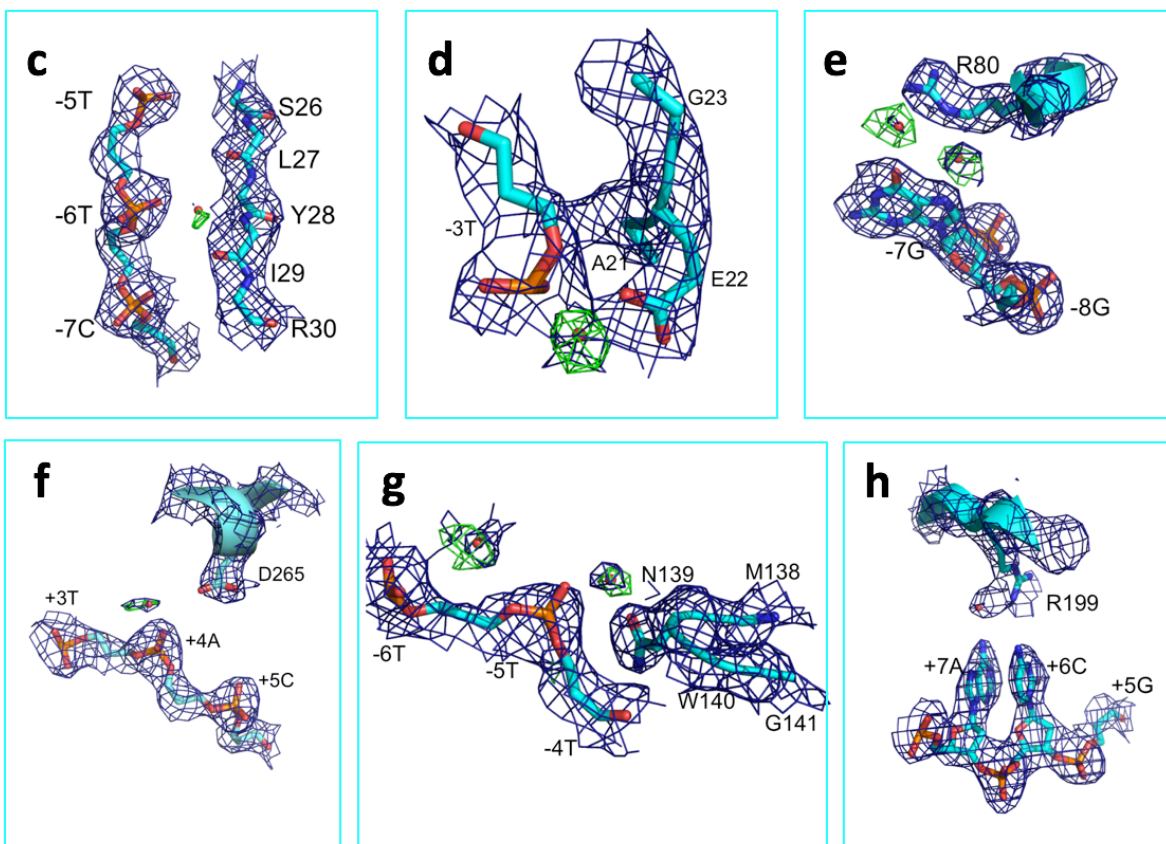

**Supplementary Table S1.** Crystallographic data and refinement statistics

| Structure                   | WT                   | eOnuCCR5                | eOnuTCR $\alpha$          | eOnuHIVInt                | eOnu7280                  | eOnu11377                 |
|-----------------------------|----------------------|-------------------------|---------------------------|---------------------------|---------------------------|---------------------------|
| PDB Code                    | 3QQY                 | 5THG                    | 5T2H                      | 5T8D                      | 5T2N                      | 5T2O                      |
| <b>Data Collection</b>      |                      |                         |                           |                           |                           |                           |
| Space group                 | P2(1)2(1)2(1)        | P2(1)2(1)2(1)           | P2(1)2(1)2(1)             | P2(1)2(1)2(1)             | P2(1)2(1)2(1)             | P2(1)2(1)2(1)             |
| <i>Cell dimensions</i>      |                      |                         |                           |                           |                           |                           |
| a, b, c (Å)                 | 37.95, 73.93, 166.93 | 75.96, 112.35, 122.88   | 39.70, 68.93, 157.53      | 39.70, 75.01, 165.16      | 40.83, 67.42, 166.88      | 40.18, 64.84, 167.01      |
| $\alpha, \beta, \gamma$ (°) | 90.00, 90.00, 90.00  | 90.00, 90.00, 90.00     | 90.00, 90.00, 90.00       | 90.00, 90.00, 90.00       | 90.00, 90.00, 90.00       | 90.00, 90.00, 90.00       |
| Resolution (Å)              | 44.46 - 2.40         | 47.77-3.11 (3.2 - 3.11) | 50.0 - 2.52 (2.61 - 2.52) | 50.0 - 2.15 (2.23 - 2.15) | 50.0 - 2.08 (2.15 - 2.08) | 50.0 - 2.80 (2.90 - 2.80) |
| Rmerge                      | 0.080 (0.140)        | 0.157 (0.649)           | 0.102 (0.805)             | 0.093 (0.618)             | 0.094 (0.793)             | 0.155 (0.877)             |
| I/ $\sigma$ I               | 18.6 (9.62)          | 12.7 (2.2)              | 25.7 (2.2)                | 29.3 (3.2)                | 19.1 (2.3)                | 15.4 (2.3)                |
| Completeness (%)            | 96.8 (91.0)          | 99.9 (100.0)            | 99.2 (95.3)               | 99.9 (99.2)               | 99.6 (99.0)               | 98.4 (96.9)               |
| Redundancy                  | 6.7 (4.8)            | 7.2 (6.8)               | 13.0 (10.7)               | 12.6 (11.0)               | 11.9 (8.9)                | 12.6 (10.9)               |
| CC 1/2                      |                      | 0.924                   | 0.853                     | 0.904                     | 0.883                     | 0.859                     |
| <b>Refinement</b>           |                      |                         |                           |                           |                           |                           |
| No. Reflections             | 18568                | 19313                   | 15161                     | 27694                     | 28473                     | 11138                     |
| Rwork (Rfree) (%)           | 18.9 (24.0)          | 22.64 (27.88)           | 21.16 (26.53)             | 18.22 (22.95)             | 21.99 (25.78)             | 22.43 (28.08)             |
| No. Complex in ASU          | 1                    | 2                       | 1                         | 1                         | 1                         | 1                         |
| <i>No. Atoms</i>            |                      |                         |                           |                           |                           |                           |
| Protein                     | 2419                 | 4414                    | 2292                      | 2335                      | 2269                      | 2301                      |
| DNA                         | 1060                 | 2318                    | 1025                      | 1066                      | 1063                      | 1066                      |
| Ca <sup>2+</sup>            | 0                    | 4                       | 2                         | 3                         | 4                         | 2                         |
| Mg <sup>2+</sup>            | 1                    | 0                       | 0                         | 0                         | 0                         | 0                         |
| Water                       | 73                   | 13                      | 25                        | 261                       | 59                        | 13                        |
| B-factor                    | 30.56                | 59.3                    | 54.8                      | 34.3                      | 49.8                      | 47.4                      |
| <i>R.m.s deviations</i>     |                      |                         |                           |                           |                           |                           |
| Bond lengths (Å)            | 0.018                | 0.006                   | 0.003                     | 0.007                     | 0.003                     | 0.003                     |
| Bond angles (°)             | 2.217                | 0.690                   | 0.517                     | 0.998                     | 0.697                     | 0.545                     |
| <i>Ramachandran</i>         |                      |                         |                           |                           |                           |                           |
| Preferred (%)               | 90.40                | 92.29                   | 96.26                     | 95.83                     | 95.12                     | 96.19                     |
| Allowed (%)                 | 8.50                 | 5.43                    | 3.74                      | 4.17                      | 4.53                      | 3.11                      |
| Outliers (%)                | 1.10                 | 2.28                    | 0.00                      | 0.00                      | 0.35                      | 0.69                      |

**Supplementary Table S2.** Pairwise structural RMSD values for superposed proteins, DNA targets, and protein-DNA complexes, respectively. The number of alpha carbons overlapped in protein alignments is shown in parentheses.

| <b>PROTEIN</b> | I-Onul  | eOnuCCR5   | eOnuTCRa   | eOnuHIVInt | eOnu7280   | eOnu11377  |
|----------------|---------|------------|------------|------------|------------|------------|
| I-Onul         | 0 (299) | 0.70 (253) | 0.52 (252) | 0.50 (256) | 0.59 (246) | 0.66 (255) |
| eOnuCCR5       |         | 0 (294)    | 0.57 (242) | 0.55 (239) | 0.65 (238) | 0.61 (249) |
| eOnuTCRa       |         |            | 0 (296)    | 0.30 (242) | 0.41 (241) | 0.39 (234) |
| eOnuHIVInt     |         |            |            | 0 (292)    | 0.31 (215) | 0.37 (230) |
| eOnu7280       |         |            |            |            | 0 (292)    | 0.38 (226) |
| eOnu11377      |         |            |            |            |            | 0 (293)    |
|                |         |            |            |            |            |            |
|                |         |            |            |            |            |            |
|                |         |            |            |            |            |            |
| <b>DNA</b>     | I-Onul  | eOnuCCR5   | eOnuTCRa   | eOnuHIVInt | eOnu7280   | eOnu11377  |
| I-Onul         | 0       | 1.53       | 1.34       | 1.77       | 1.42       | 1.74       |
| eOnuCCR5       |         | 0          | 1.45       | 1.66       | 1.41       | 1.51       |
| eOnuTCRa       |         |            | 0          | 1.59       | 1.32       | 1.48       |
| eOnuHIVInt     |         |            |            | 0          | 1.51       | 1.45       |
| eOnu7280       |         |            |            |            | 0          | 1.26       |
| eOnu11377      |         |            |            |            |            | 0          |
|                |         |            |            |            |            |            |
|                |         |            |            |            |            |            |
|                |         |            |            |            |            |            |
| <b>COMPLEX</b> | I-Onul  | eOnuCCR5   | eOnuTCRa   | eOnuHIVInt | eOnu7280   | eOnu11377  |
| I-Onul         | 0       | 1.71       | 1.77       | 1.58       | 1.42       | 1.81       |
| eOnuCCR5       |         | 0          | 1.57       | 1.45       | 1.56       | 1.69       |
| eOnuTCRa       |         |            | 0          | 1.07       | 1.36       | 1.68       |
| eOnuHIVInt     |         |            |            | 0          | 1.11       | 1.55       |
| eOnu7280       |         |            |            |            | 0          | 1.46       |
| eOnu11377      |         |            |            |            |            | 0          |
